# Supplementary material for: Low Vanadium Permeability Membranes Based on Flexible Hydrophilic Side Chain Grafted Polybenzimidazole/Polymeric Ionic Liquid for VRFBs
Source: MDPI journal article supplement (doi:10.3390/batteries9020141), 2023-02-20
Supplement: s1 [file s1]

Archive with 1 entries (1 files):
- batteries-2155539-supplementary.pdf
